# Supplementary material for: Infection With Viruses From Several Families Triggers Autoimmune Diabetes in LEW.1WR1 Rats
Source: Oxford University Press journal article supplement (doi:10.2337/db09-0255), 2009-09-30
Supplement: db09-0255_online_appendix.pdf [file db09-0255_online_appendix.pdf]

**Supplemental Online Table 1** Rat pathogens tested for and found absent in the rats used in these studies.

|                          |                                    |                           |
|--------------------------|------------------------------------|---------------------------|
| Sendai virus             | Pneumonia virus of mice            | Sialodacryoadenitis virus |
| Rat corona virus,<br>GD7 | Kilham rat virus                   | H-1                       |
| Ljungan virus            | Reo-3                              | Mycoplasma pulmonis       |
| Encephalitozoon cuniculi | Mouse adenovirus                   | Hantaan virus             |
|                          | Lymphocytic choriomeningitis virus |                           |
